# Supplementary material for: Control-synthesized multilayer hyperbranched–hyperbranched polyethers with a tunable molecular weight and an invariant degree of branching
Source: Royal Society of Chemistry journal article supplement (doi:10.1039/c5nj02895g), 2016-01-01
Supplement: c5nj02895g1.pdf [file c5nj02895g1.pdf]

## SUPPORTING INFORMATION

### Control-Synthesized Multilayer Hyperbranched-Hyperbranched Polyethers with Tunable Molecular Weight and Invariant Degree of Branching

Tuan Liu<sup>1,2</sup>, Xuepei Miao<sup>1,2</sup>, Xinxin Geng<sup>1</sup>, An Xing<sup>1</sup>, Liangdong Zhang<sup>2</sup>, Yan Meng<sup>1,\*</sup> and Xiaoyu Li<sup>2,\*</sup>

1. Key Laboratory of Carbon Fiber and Functional Polymers, Ministry of Education, Beijing University of Chemical Technology, Beijing 100029, P. R. China

2. State Key Laboratory of Organic-Inorganic Composites, Beijing University of Chemical Technology, Beijing 100029, P. R. China

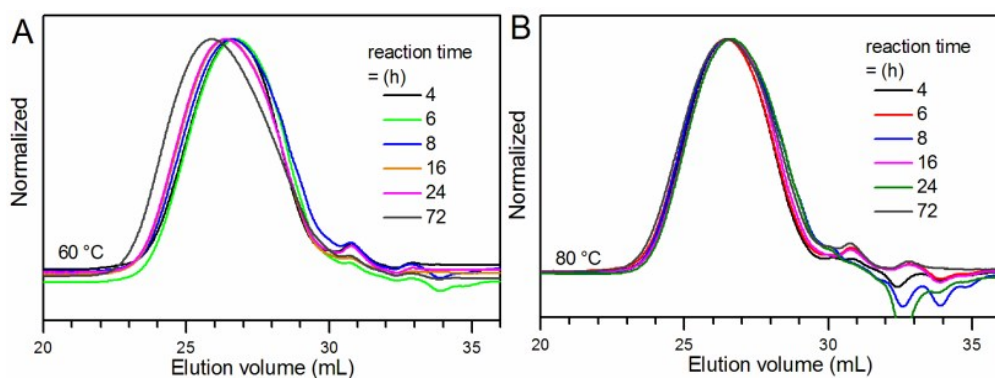

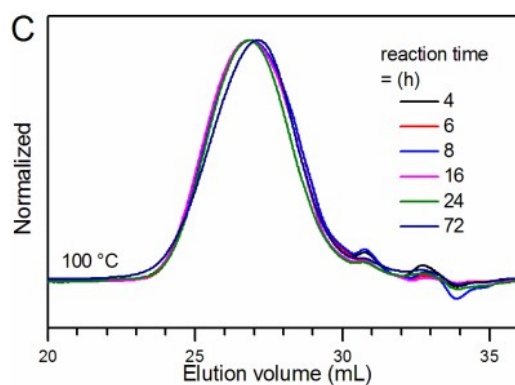

**Fig. S1.** Normalized GPC results of HBPE-2C as a function of reaction time when polymerization is carried out at (A) 60 °C, (B) 80 °C, and (C) 100 °C.

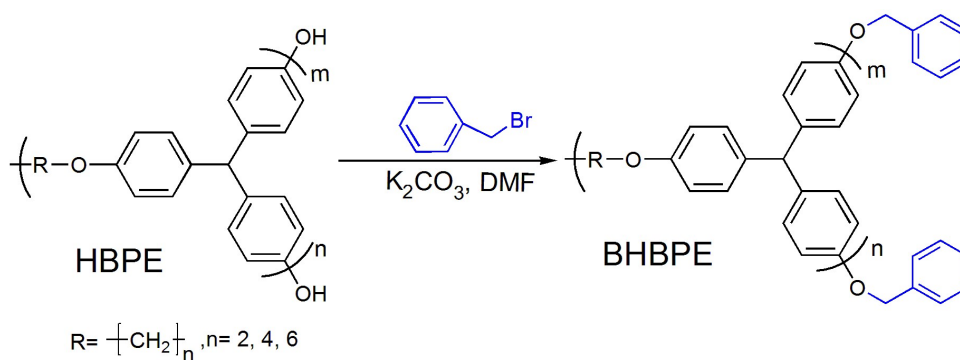

**Fig. S2.** The reaction route for terminal group modification.

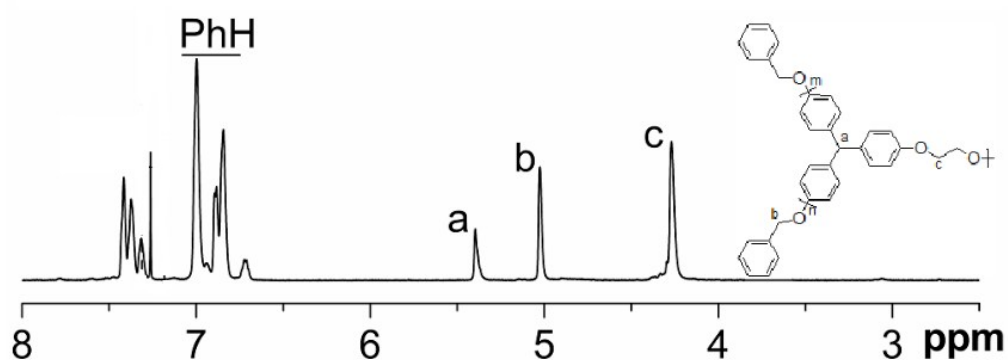

**Fig. S3.**  $^1\text{H}$  NMR spectra of benzyl-terminated HBPE-2C (BHBPE-2C).

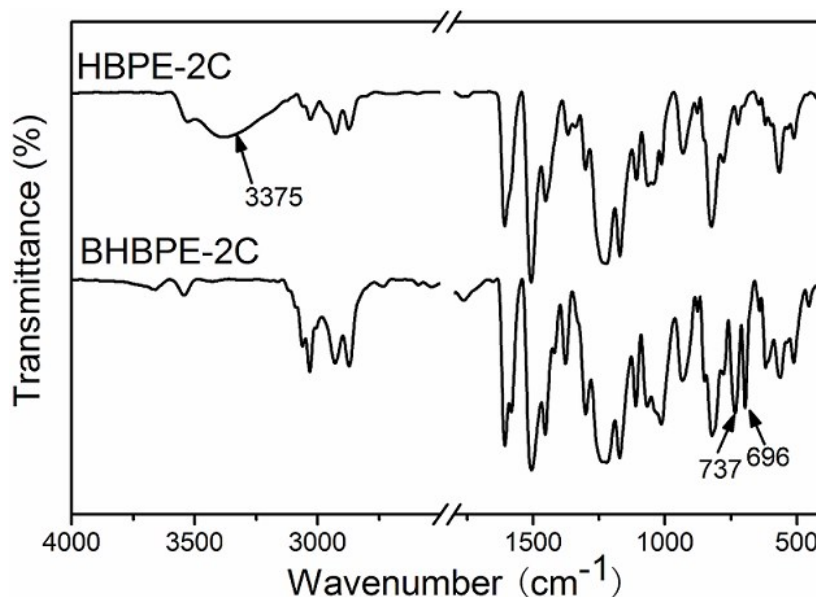

**Fig. S4.** FTIR spectra of HBPE-2C and BHBPE-2C.

**Terminal group modification of HBPE-2C-1.** 2 g HBPE-2C-1, 10.4 g benzyl bromide, 3.6 g  $K_2CO_3$ , and 40 mL DMF were added into three-necked flask. Under mechanical stirring, reactants were heated to 80 °C and kept for 24 h under dry nitrogen atmosphere. After cooling to room temperature, the mixture was filtered and precipitated into petroleum ether twice. After the precipitate was dried under vacuum at 90 °C, the obtained benzyl-terminated HBPE-2C (BHBPE-2C) is a light red solid. Yield: 1.8 g, 70%.  $^1H$ -NMR (600 MHz,  $CDCl_3$ ,  $\delta$ ): 4.22-4.30 (br, O- $CH_2CH_2$ -O), 5.00-5.05 (br,  $Ph_3CH_2$ -O), 5.36-5.42 (br,  $Ph_3CH$ ), 6.80-7.44 (br,  $C_6H_4$ O).

**Synthesis of triphenol methane.** PHBA (24.4 g, 0.2 mol), phenol (94 g, 1.0 mol),  $ZnCl_2$  (2.8 g, 0.02 mol), and PTSA (3.8 g, 0.02 mol) were added into a three-necked flask equipped with mechanical stir and thermometer. After stirring for 1 h, reactants were heated to 45 °C and kept for 24 h. The solution was filtered and washed at least twice using both dichloromethane (200 mL) and hot water (>70 °C). The resultant

mixtures were dried under vacuum at 90 °C. The obtained pure product is a brick-red solid with a yield of 70%. <sup>1</sup>H-NMR (600 MHz, acetone-d<sub>6</sub>, δ): 5.33 (s, 1H, Ph<sub>3</sub>CH), 6.76 (d, 6H, C<sub>6</sub>H<sub>4</sub>O), 6.94 (d, 6H, C<sub>6</sub>H<sub>4</sub>O), 8.15 (s, 3H, PhOH); <sup>13</sup>C-NMR (600 MHz, acetone, δ): 54.32, 114.75, 130.06, 136.04, 155.50.

**Synthesis of model compounds for the terminal unit (T).** 2C-AB<sub>2</sub> (8 g, 0.02 mol), phenol (7.52, 0.08 mol), K<sub>2</sub>CO<sub>3</sub> (16.58 g, 0.12 mol), and 200 mL DMF were added into a three-necked flask equipped under mechanical stirring. Reactants were heated to 80 °C and kept for 24 h and then cooled to room temperature. The mixture was acidified with hydrochloric acid and then filtered. After removing most DMF using a rotary evaporator, the remanent solution was pure into water. The precipitate was collected and dried under vacuum. The crude product was purified by a silica gel column with 1:1 ethyl acetate/petroleum ether as the eluent, and the obtained the product is a brick red solid with a yield of 90%. <sup>1</sup>H-NMR (600 MHz, (methyl sulfoxide)-d<sub>6</sub>, δ): 4.30-4.24 (br, 4H, O(CH<sub>2</sub>)<sub>2</sub>O), 5.29 (s, 1H, Ph<sub>3</sub>CH), 6.68 (d, 4H, C<sub>6</sub>H<sub>4</sub>O), 6.84-7.00 (m, 11H, C<sub>6</sub>H<sub>4</sub>O), 7.29 (t, 2H, C<sub>6</sub>H<sub>4</sub>O). <sup>13</sup>C-NMR (600 MHz, (methyl sulfoxide)-d<sub>6</sub>, δ): 54.02, 66.65, 66.73, 114.60, 114.93, 115.40, 121.19, 129.99, 130.23, 130.33, 135.43, 137.79, 155.93, 156.93, 158.77.

**Synthesis of model compounds with well defined linear (L) and the denritic (D)**

**units.** Both compounds were synthesized using the same method. Triphenol methane (11.68 g, 0.04 mol), 2-Phenoxyethylbromide (40.2 g, 0.2 mol), K<sub>2</sub>CO<sub>3</sub> (16.6 g, 0.12

mol), and 200 mL DMF was added into a three-necked flask under mechanical stirring. The reactants were heated to 80 °C and kept for 24 h and then cooled to room temperature. The mixture was acidified with hydrochloric acid and then filtered. Most DMF was removed by a rotary evaporator. The crude product was purified by silica gel column chromatography with 1:20 ethyl acetate/petroleum ether as the eluent. The obtained product is a white crystal-like solid. The compounds with well defined linear and dendritic units have yields of 40% (L) and 25% (D), respectively.

**Linear unit (L):**  $^1\text{H-NMR}$  (600 MHz, (methyl sulfoxide)- $d_6$ ,  $\delta$ ): 4.25-4.30 (br, 4H,  $\text{O}(\text{CH}_2)_2\text{O}$ ), 5.37 (s, 1H,  $\text{Ph}_3\text{CH}$ ), 6.69 (d, 2H,  $\text{C}_6\text{H}_4\text{O}$ ), 6.86-7.00 (m, 16H,  $\text{C}_6\text{H}_4\text{O}$ ), 7.29 (t, 4H,  $\text{C}_6\text{H}_4\text{O}$ ).  $^{13}\text{C-NMR}$  (600 MHz, (methyl sulfoxide)- $d_6$ ,  $\delta$ ): 53.45, 66.20, 114.18, 114.43, 114.96, 120.70, 129.49, 129.77, 129.86, 134.67, 137.02, 155.54, 156.53, 158.29.

**Dendritic unit (D):**  $^1\text{H-NMR}$  (600 MHz, (methyl sulfoxide)- $d_6$ ,  $\delta$ ): 4.30-4.26 (br, 4H,  $\text{O}(\text{CH}_2)_2\text{O}$ ), 5.45 (s, 1H,  $\text{Ph}_3\text{CH}$ ), 6.89-7.10 (m, 21H,  $\text{C}_6\text{H}_4\text{O}$ ), 7.29 (t, 6H,  $\text{C}_6\text{H}_4\text{O}$ ).

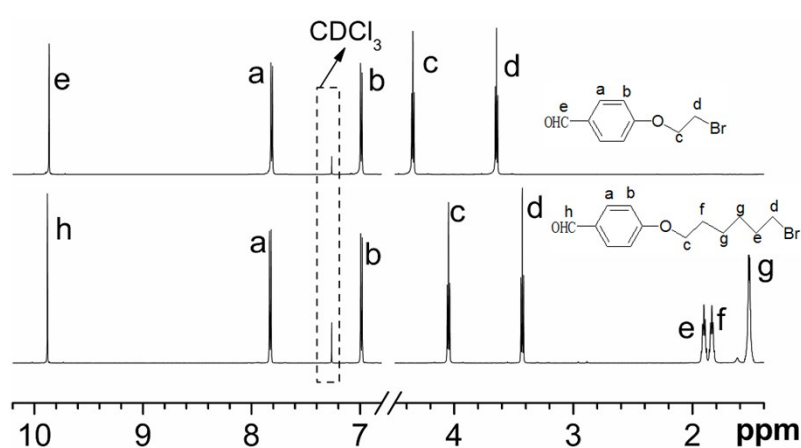

**Fig. S5.**  $^1\text{H}$  NMR spectra of intermediate molecules of  $\text{AB}_2$  monomers with different spacer lengths, *i.e.*,  $n=2$  and 6.

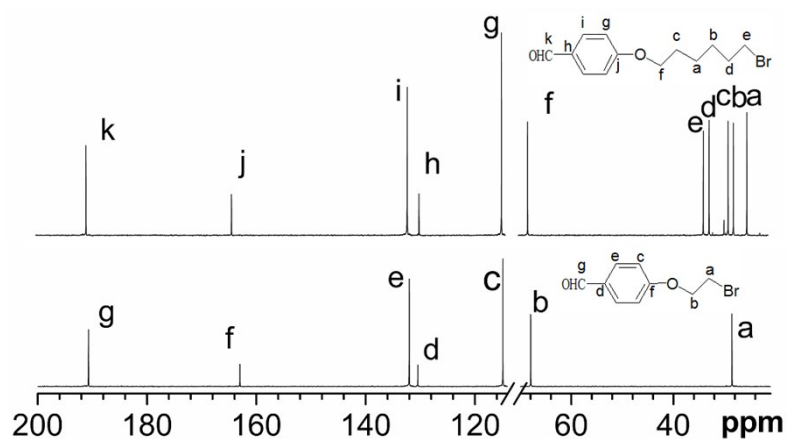

**Fig. S6.**  $^{13}\text{C}$  NMR spectra of intermediate molecules with different spacer lengths, *i.e.*,  $n=2$  and 6.

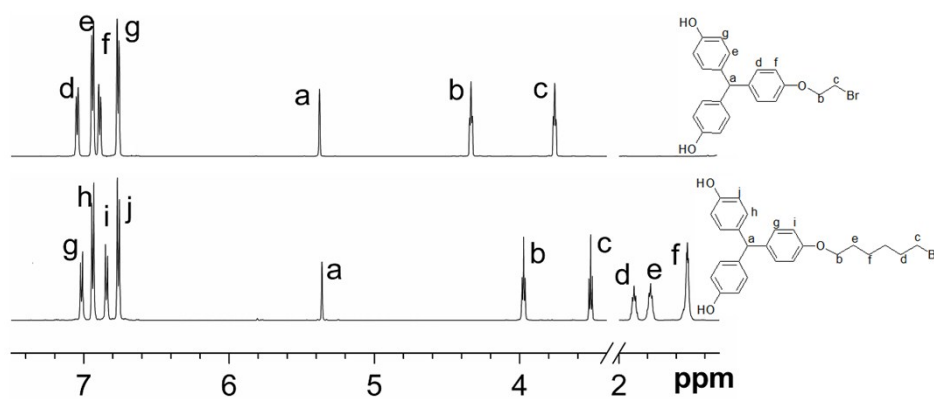

**Fig. S7.**  $^1\text{H}$  NMR spectra of three  $\text{AB}_2$  monomers with different spacer lengths, *i.e.*,  $n=2$  and 6.

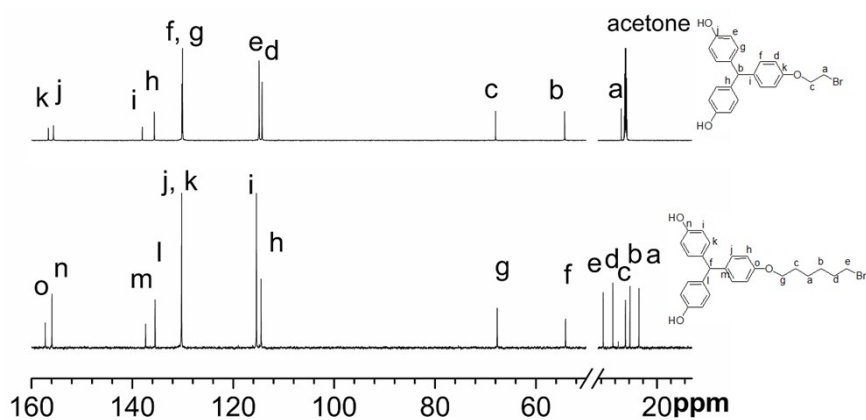

**Fig. S8.**  $^{13}\text{C}$  NMR spectra of three  $\text{AB}_2$  monomers with different spacer lengths, *i.e.*,  $n = 2$  and  $6$ .

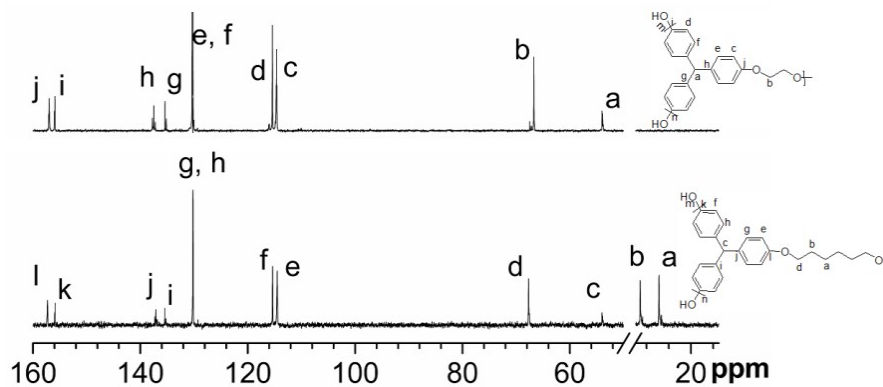

**Fig. S9.** The  $^{13}\text{C}$  NMR spectra of HBPEs ( $80^\circ\text{C}$ ,  $0.1\text{ mol/L}$ ) obtained from monomers with different spacer lengths, *i.e.*,  $n = 2$  and  $6$ .

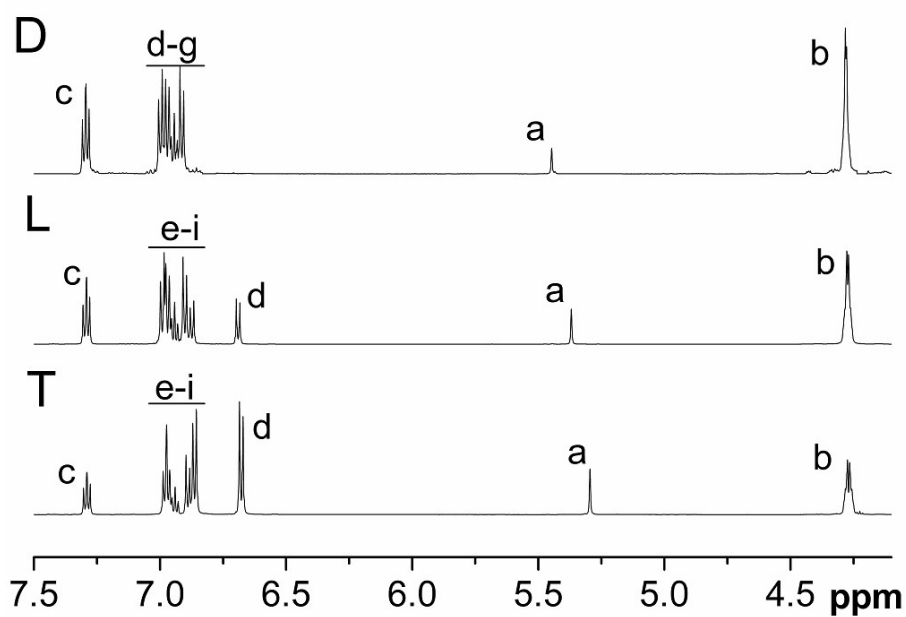

**Fig. S10.** The  $^1\text{H}$  NMR spectra of three model molecules, which can be used to determine the degree of branching of HBPEs.

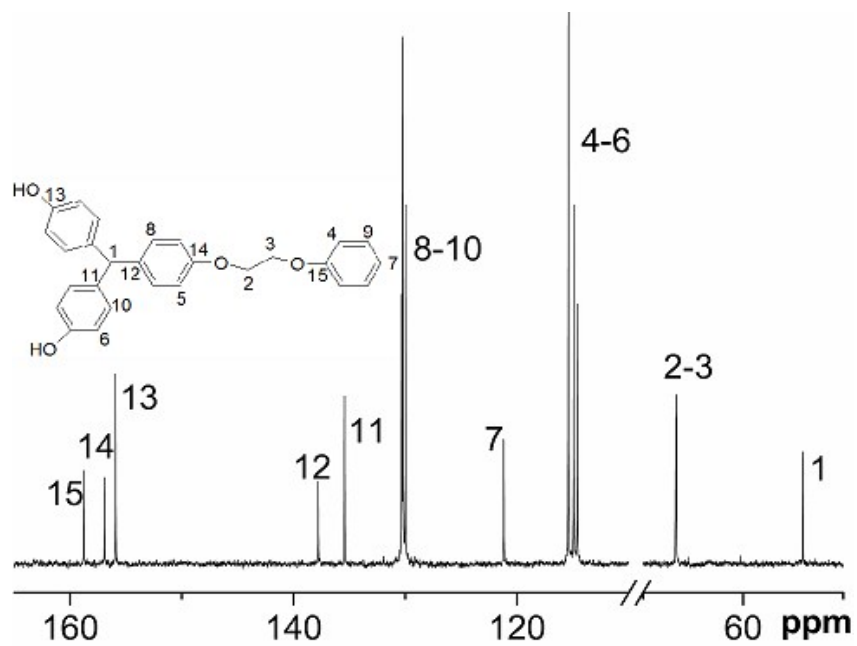

**Fig. S11.** The  $^{13}\text{C}$  NMR spectra of the model molecule showing the peak positions of the terminal unit (T).

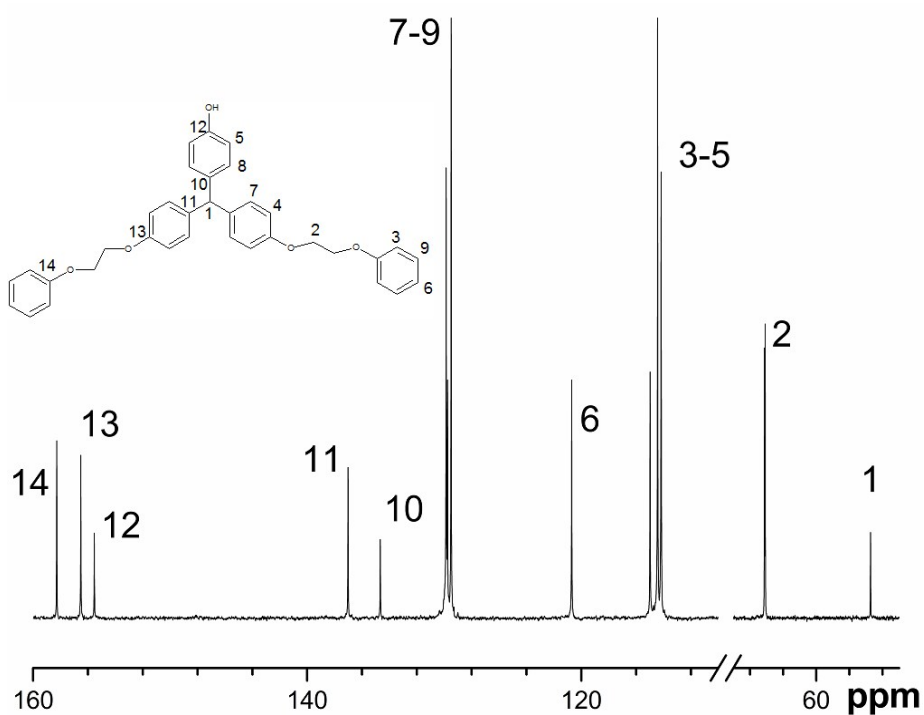

**Fig. S12.**  $^{13}\text{C}$  NMR spectra of the model molecule showing the peak positions of the linear unit (L).



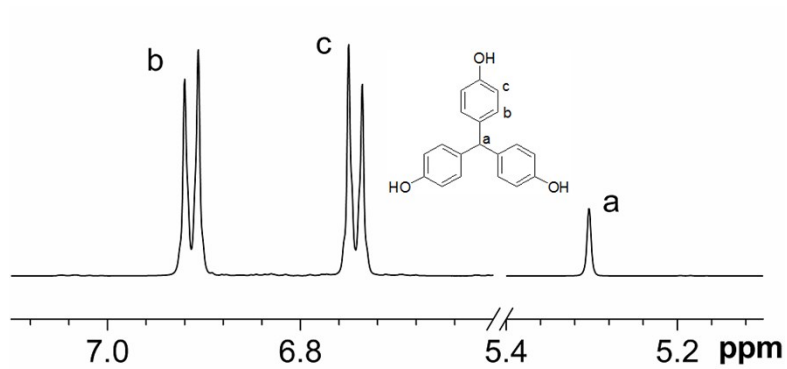

**Fig. S13.**  $^1\text{H}$  NMR spectra of the model molecule, triphenol methane.

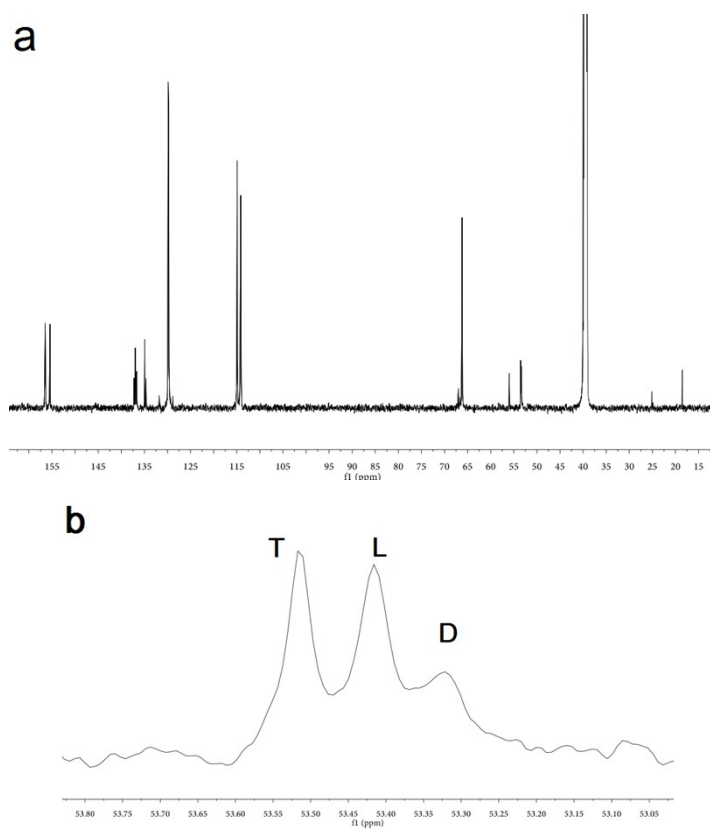

**Fig. S14.**  $^{13}\text{C}$  NMR spectra of HBPE2C-5 (a) and the enlarged view covering 53 to 54 ppm (b).

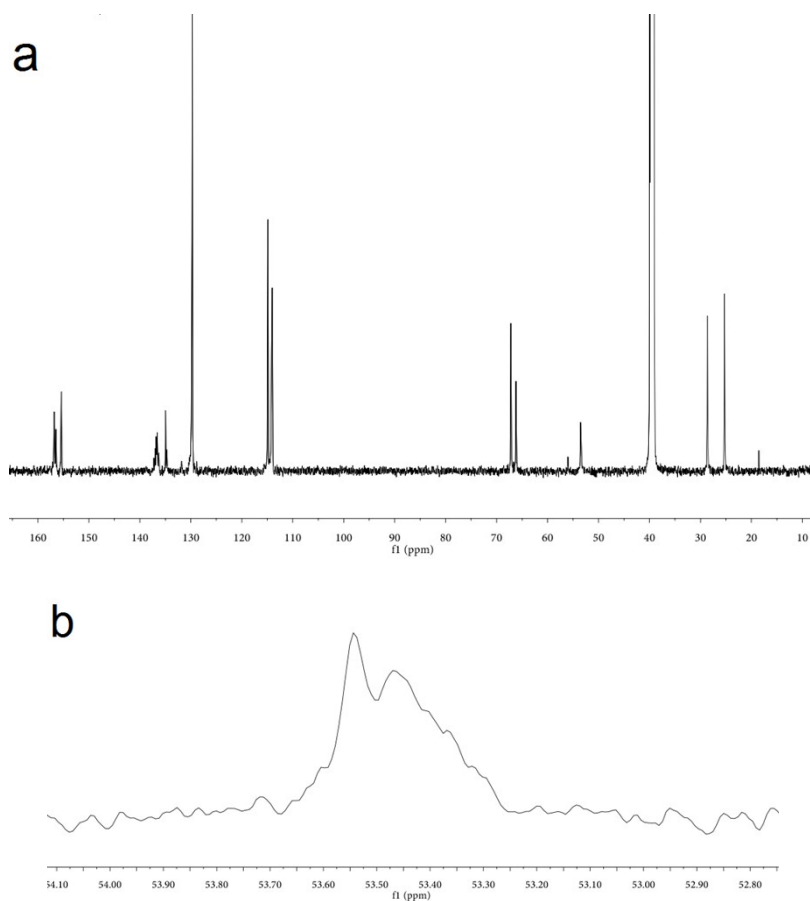

**Fig. S15.**  $^{13}\text{C}$  NMR spectra of C2-C6-C2-C6 (a) and its enlarged views (b).

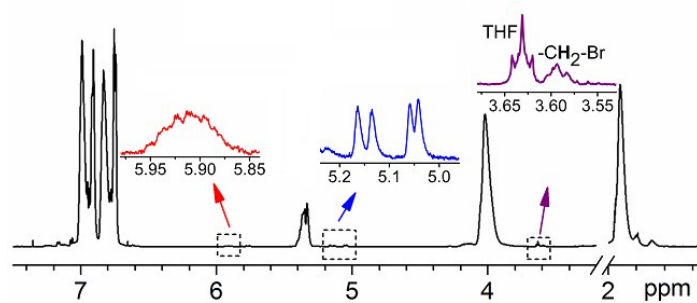

**Fig. S16.** The  $^1\text{H}$  NMR spectrum of HBPE-4C-1 (80 °C, 24 h). Insets show the enlarged views of boxed regions.
